# Supplementary material for: Unique features and clinical importance of acute alloreactive immune responses
Source: PubMed Central journal article supplement (PMC6012511; doi:10.1172/jci.insight.97219), 2018-05-17
Supplement: jciinsight-3-97219-s006.pdf [file jciinsight-3-97219-s006.pdf]

| Patient code | Diagnosis                          | Age at transplant | Donor | Conditioning   | GvHD prophylaxis | GvHD II-IV | Tissue affected | Grade | Acute GvHD Classification | Time to GvHD (days) | GvHD treatment                                 | Patient CMV status | Donor CMV status |
|--------------|------------------------------------|-------------------|-------|----------------|------------------|------------|-----------------|-------|---------------------------|---------------------|------------------------------------------------|--------------------|------------------|
| 1_Allo       | AML                                | 61                | MUD   | Flu/Melph/Keam | CSA only         | No         |                 |       | N/A                       |                     |                                                | Pos                | Pos              |
| 2_Allo       | CLL                                | 68                | SIB   | Flu/Melph/Keam | CSA only         | No         |                 |       | N/A                       |                     |                                                | Pos                | Neg              |
| 3_Allo       | MDS                                | 58                | MUD   | Flu/Melph/Keam | CSA only         | No         |                 |       | N/A                       |                     |                                                | Pos                | Neg              |
| 4_Allo       | AML                                | 53                | SIB   | Flu/Melph/Keam | CSA only         | No         |                 |       | N/A                       |                     |                                                | Pos                | Neg              |
| 5_Allo       | ALL                                | 64                | MUD   | Flu/Melph/Keam | CSA only         | Yes        | Skin            | II    | Classic aGvHD             | 43                  | Prod                                           | Pos                | Neg              |
| 6_Allo       | HL                                 | 55                | SIB   | Flu/Melph/Keam | CSA only         | No         |                 |       | N/A                       |                     |                                                | Pos                | Neg              |
| 7_Allo       | AML                                | 51                | MUD   | Flu/Melph/Keam | CSA only         | No         |                 |       | N/A                       |                     |                                                | Pos                | Neg              |
| 8_Allo       | AML                                | 62                | MUD   | Flu/Melph/Keam | CSA only         | No         |                 |       | N/A                       |                     |                                                | Pos                | Pos              |
| 9_Allo       | CLL                                | 59                | SIB   | Flu/Melph/Keam | CSA only         | Yes        | Liver           | IV    | Classic aGvHD             | 20                  | MethyF Prod (IV) and Prod                      | Pos                | Neg              |
| 10_Allo      | CLL                                | 59                | MUD   | Flu/Melph/Keam | CSA only         | No         |                 |       | N/A                       |                     |                                                | Pos                | Neg              |
| 11_Allo      | AML                                | 37                | MUD   | TBI/Cy         | CSA + MTX        | No         |                 |       | N/A                       |                     |                                                | Pos                | Neg              |
| 12_Allo      | AML                                | 21                | MUD   | TBI/Cy         | CSA + MTX        | Yes        | Lower Gut       | II    | Classic aGvHD             | 16                  | MethyF Prod (IV) then oral Prod                | Neg                | Neg              |
| 13_Allo      | CLL                                | 44                | SIB   | Flu/Melph/Keam | CSA only         | No         |                 |       | N/A                       |                     |                                                | Pos                | Pos              |
| 14_Allo      | ALL                                | 21                | MUD   | Cy/TBI         | CSA + MTX        | Yes        | Skin            | II    | Classic aGvHD             | 56                  | MethyF Prod (IV)                               | Pos                | Neg              |
| 15_Allo      | AML                                | 70                | MUD   | Flu/Melph/Keam | CSA only         | No         |                 |       | N/A                       |                     |                                                | Pos                | Neg              |
| 16_Allo      | GS                                 | 66                | MUD   | Flu/Melph/Keam | CSA only         | Yes        | Skin            | II    | Classic aGvHD             | 29                  | MethyF Prod (IV)                               | Pos                | Pos              |
| 17_Allo      | HL                                 | 48                | MUD   | Flu/Melph/Keam | CSA only         | Yes        | Skin            | II    | Classic aGvHD             | 45                  | MethyF Prod (IV)                               | Pos                | Neg              |
| 18_Allo      | AML                                | 66                | MUD   | Flu/Melph/Keam | CSA only         | Yes        | Lower Gut       | II    | Delayed aGvHD             | 157                 | MethyF Prod (IV)                               | Pos                | Neg              |
| 19_Allo      | AML                                | 23                | MUD   | Cy/TBI         | CSA + MTX        | No         |                 |       | N/A                       |                     |                                                | Neg                | Pos              |
| 20_Allo      | AML                                | 44                | MUD   | Cy/TBI         | CSA + MTX        | No         |                 |       | N/A                       |                     |                                                | Pos                | Pos              |
| 21_Allo      | AML                                | 54                | SIB   | Flu/Melph/Keam | CSA only         | No         |                 |       | N/A                       |                     |                                                | Neg                | Neg              |
| 22_Allo      | ALL                                | 44                | MUD   | TBI/Cy         | CSA + MTX        | Yes        | Lower Gut       | II    | Classic aGvHD             | 24                  | MethyF Prod (IV)                               | Neg                | Neg              |
| 23_Allo      | AML                                | 56                | SIB   | Flu/Melph/Keam | CSA only         | Yes        | Skin            | II    | Classic aGvHD             | 36                  | MethyF Prod (IV)                               | Neg                | Pos              |
| 24_Allo      | AML                                | 44                | MUD   | Flu/Melph/Keam | CSA only         | No         |                 |       | N/A                       |                     |                                                | Pos                | Neg              |
| 25_Allo      | MDS                                | 57                | SIB   | Flu/Melph/Keam | CSA only         | No         |                 |       | N/A                       |                     |                                                | Neg                | Pos              |
| 26_Allo      | MF                                 | 49                | SIB   | Flu/Melph/Keam | CSA only         | No         |                 |       | N/A                       |                     |                                                | Neg                | Neg              |
| 27_Allo      | AML                                | 62                | SIB   | Flu/Melph/Keam | CSA only         | No         |                 |       | N/A                       |                     |                                                | Neg                | Neg              |
| 28_Allo      | MF                                 | 44                | MUD   | Flu/Melph/Keam | CSA only         | No         |                 |       | N/A                       |                     |                                                | Pos                | Neg              |
| 29_Allo      | Double Hit Lymphoma                | 46                | MUD   | Beam/Keam      | CSA + MTX        | Yes        | Skin            | II    | Delayed aGvHD             | 134                 | Prod                                           | Neg                | Pos              |
| 30_Allo      | AML                                | 52                | SIB   | Flu/Melph/Keam | CSA only         | No         |                 |       | N/A                       |                     |                                                | Neg                | Pos              |
| 31_Allo      | NHL                                | 51                | MUD   | Flu/Melph/Keam | CSA only         | No         |                 |       | N/A                       |                     |                                                | Neg                | Neg              |
| 32_Allo      | NHL                                | 57                | MUD   | Flu/Melph/Keam | CSA only         | No         |                 |       | N/A                       |                     |                                                | Pos                | Pos              |
| 33_Allo      | NHL                                | 55                | SIB   | Beam/Keam      | CSA + MTX        | Yes        | Skin and Gut    | II    | Classic aGvHD             | 14                  | Prod (skin) systemic steroids MethyF Prod (IV) | Pos                | Pos              |
| 34_Allo      | AML                                | 45                | MUD   | Flu/Melph/Keam | CSA only         | No         |                 |       | N/A                       |                     |                                                | Neg                | Neg              |
| 35_Allo      | AML                                | 43                | MUD   | Flu/Melph/Keam | CSA only         | No         |                 |       | N/A                       |                     |                                                | Pos                | Pos              |
| 36_Allo      | MDS                                | 67                | MUD   | Flu/Melph/Keam | CSA only         | Yes        | Skin            | II    | Delayed aGvHD             |                     | Topical steroids, increased CSA                | Pos                | Neg              |
| 37_Allo      | AML                                | 64                | MUD   | Flu/Melph/Keam | CSA only         | No         |                 |       | N/A                       |                     |                                                | Pos                | Neg              |
| 38_Allo      | NHL                                | 50                | MUD   | Beam/Keam      | CSA only         | Yes        | Lower Gut       | II    | Classic aGvHD             | 11                  | Prod                                           | Neg                | Neg              |
| 39_Allo      | AML                                | 63                | SIB   | Flu/Melph/Keam | CSA only         | No         |                 |       | N/A                       |                     |                                                | Pos                | Neg              |
| 40_Allo      | B-ALL                              | 54                | MUD   | Flu/Melph/Keam | CSA only         | No         |                 |       | N/A                       |                     |                                                | Pos                | Neg              |
| 41_Allo      | AML                                | 61                | MUD   | Flu/Melph/Keam | CSA only         | Yes        | Skin            | II    | Classic aGvHD             | 362                 | Prod                                           | Pos                | Neg              |
| 42_Allo      | AML                                | 62                | MUD   | Flu/Melph/Keam | CSA only         | No         |                 |       | N/A                       |                     |                                                | Pos                | Pos              |
| 43_Allo      | DLBCL                              | 57                | MUD   | Flu/beam/Keam  | CSA only         | No         |                 |       | N/A                       |                     |                                                | Neg                | Neg              |
| 44_Allo      | MDS                                | 57                | MUD   | Flu/Melph/Keam | CSA only         | No         |                 |       | N/A                       |                     |                                                | Pos                | Pos              |
| 45_Allo      | AML                                | 65                | SIB   | Flu/Melph/Keam | CSA only         | No         |                 |       | N/A                       |                     |                                                | Pos                | Pos              |
| 46_Allo      | AML                                | 44                | MUD   | Cy/TBI         | CSA + MTX        | Yes        | Skin            | II    | Classic aGvHD             | 50                  | Prod                                           | Pos                | Pos              |
| 47_Allo      | HL                                 | 37                | MUD   | Flu/Melph/Keam | CSA only         | Yes        |                 |       | Delayed aGvHD             |                     |                                                | Neg                | Pos              |
| 48_Allo      | AML                                | 63                | MUD   | Flu/Melph/Keam | CSA only         | No         |                 |       | N/A                       |                     |                                                | Pos                | Pos              |
| 49_Allo      | AML                                | 21                | MUD   | Cy/TBI         | CSA + MTX        | No         |                 |       | N/A                       |                     |                                                | Pos                | Pos              |
| 50_Allo      | Periphera THNL                     | 49                | SIB   | Beam/Keam      | CSA only         | No         |                 |       | N/A                       |                     |                                                | Neg                | Neg              |
| 51_Allo      | MDS                                | 48                | SIB   | Flu/Melph/Keam | CSA only         | No         |                 |       | N/A                       |                     |                                                | Neg                | Pos              |
| 52_Allo      | AML                                | 25                | SIB   | Bu/Cy          | CSA + MTX        | Yes        | Liver           | III   | Classic aGvHD             | 96                  |                                                |                    |                  |
| 1_Auto       | HL                                 | 28                | AUTO  | BEAM           |                  |            |                 |       |                           |                     |                                                | Pos                |                  |
| 2_Auto       | Myeloma                            | 62                | AUTO  | Melphalan      |                  |            |                 |       |                           |                     |                                                | Neg                |                  |
| 3_Auto       | Myeloma                            | 58                | AUTO  | Melphalan      |                  |            |                 |       |                           |                     |                                                | Pos                |                  |
| 4_Auto       | HL                                 | 28                | AUTO  | BEAM           |                  |            |                 |       |                           |                     |                                                | Neg                |                  |
| 5_Auto       | Myeloma                            | 51                | AUTO  | Melphalan      |                  |            |                 |       |                           |                     |                                                | Neg                |                  |
| 6_Auto       | Myeloma                            | 55                | AUTO  | Melphalan      |                  |            |                 |       |                           |                     |                                                | Neg                |                  |
| 7_Auto       | NHL                                | 64                | AUTO  | BEAM           |                  |            |                 |       |                           |                     |                                                | Pos                |                  |
| 8_Auto       | Myeloma                            | 65                | AUTO  | Melphalan      |                  |            |                 |       |                           |                     |                                                | Neg                |                  |
| 9_Auto       | Myeloma                            | 70                | AUTO  | Melphalan      |                  |            |                 |       |                           |                     |                                                | Pos                |                  |
| 10_Auto      | Myeloma                            | 40                | AUTO  | Melphalan      |                  |            |                 |       |                           |                     |                                                | Pos                |                  |
| 11_Auto      | HL                                 | 54                | AUTO  | BEAM           |                  |            |                 |       |                           |                     |                                                | Pos                |                  |
| 12_Auto      | Myeloma                            | 72                | AUTO  | Melphalan      |                  |            |                 |       |                           |                     |                                                | Neg                |                  |
| 13_Auto      | Myeloma                            | 58                | AUTO  | Melphalan      |                  |            |                 |       |                           |                     |                                                | Pos                |                  |
| 14_Auto      | Myeloma                            | 72                | AUTO  | Melphalan      |                  |            |                 |       |                           |                     |                                                | Neg                |                  |
| 15_Auto      | Myeloma                            | 52                | AUTO  | Melphalan      |                  |            |                 |       |                           |                     |                                                | Neg                |                  |
| 16_Auto      | Myeloma                            | 62                | AUTO  | Melphalan      |                  |            |                 |       |                           |                     |                                                | Pos                |                  |
| 17_Auto      | HL                                 | 21                | AUTO  | BEAM           |                  |            |                 |       |                           |                     |                                                | Pos                |                  |
| 18_Auto      | Myeloma                            | 66                | AUTO  | Melphalan      |                  |            |                 |       |                           |                     |                                                | Neg                |                  |
| 19_Auto      | NHL                                | 67                | AUTO  | BEAM           |                  |            |                 |       |                           |                     |                                                | Pos                |                  |
| 20_Auto      | Myeloma                            | 56                | AUTO  | Melphalan      |                  |            |                 |       |                           |                     |                                                | Neg                |                  |
| 21_Auto      | Myeloma                            | 61                | AUTO  | Melphalan      |                  |            |                 |       |                           |                     |                                                | Neg                |                  |
| 22_Auto      | HL                                 | 56                | AUTO  | BEAM           |                  |            |                 |       |                           |                     |                                                | Pos                |                  |
| 23_Auto      | Diffuse Large B Cell Lymphoma      | 66                | AUTO  | BEAM           |                  |            |                 |       |                           |                     |                                                | Neg                |                  |
| 24_Auto      | Myeloma                            | 69                | AUTO  | Melphalan      |                  |            |                 |       |                           |                     |                                                | Pos                |                  |
| 25_Auto      | Myeloma                            | 59                | AUTO  | Melphalan      |                  |            |                 |       |                           |                     |                                                | Neg                |                  |
| 26_Auto      | Systemic Amyloidosis               | 50                | AUTO  | Melphalan      |                  |            |                 |       |                           |                     |                                                | Pos                |                  |
| 27_Auto      | Myeloma                            | 60                | AUTO  | Melphalan      |                  |            |                 |       |                           |                     |                                                | Neg                |                  |
| 28_Auto      | HL                                 | 65                | AUTO  | BEAM           |                  |            |                 |       |                           |                     |                                                | Pos                |                  |
| 29_Auto      | Myeloma                            | 69                | AUTO  | Melphalan      |                  |            |                 |       |                           |                     |                                                | Neg                |                  |
| 30_Auto      | Myeloma                            | 69                | AUTO  | Melphalan      |                  |            |                 |       |                           |                     |                                                | Pos                |                  |
| 31_Auto      | Angioimmunoblastic T-cell Lymphoma | 37                | AUTO  | BEAM           |                  |            |                 |       |                           |                     |                                                | Pos                |                  |
| 32_Auto      | Double Hit Lymphoma                | 67                | AUTO  | BEAM           |                  |            |                 |       |                           |                     |                                                | Pos                |                  |
| 33_Auto      | lgG Myeloma                        | 62                | AUTO  | Melphalan      |                  |            |                 |       |                           |                     |                                                | Neg                |                  |
| 34_Auto      | HL                                 | 17                | AUTO  | BEAM           |                  |            |                 |       |                           |                     |                                                | Neg                |                  |
| 35_Auto      | Myeloma                            | 66                | AUTO  | Melphalan      |                  |            |                 |       |                           |                     |                                                | Neg                |                  |
| 36_Auto      | Myeloma                            | 59                | AUTO  | Melphalan      |                  |            |                 |       |                           |                     |                                                | Pos                |                  |
| 37_Auto      | Myeloma                            | 52                | AUTO  | Melphalan      |                  |            |                 |       |                           |                     |                                                | Neg                |                  |
| 38_Auto      | Myeloma                            | 64                | AUTO  | Melphalan      |                  |            |                 |       |                           |                     |                                                | Pos                |                  |

**Supplementary table 1. Clinical characteristics of patients included in the study.**

The first 52 rows describe allograft patients, remaining rows describe autograft patients. Table includes diagnosis and age at transplant. Characteristics of the transplant are then listed including ‘donor type’ (characterised as matched unrelated donor (MUD), sibling (SIB) or autograft (AUTO)) and conditioning regimen. Table then includes information relating to GvHD prophylaxis and disease including prophylactic drugs given, development of GvHD (grades II-IV), tissue affected, specific grade, NIHR classification as classic or delayed acute disease, time post SCT to GvHD onset and GvHD treatment strategy. Patient CMV status and donor CMV status at transplant are also included. Acute Myeloid Leukaemia (AML), Chronic Lymphocytic leukaemia (CLL), Myelodysplastic syndrome (MDS), Acute lymphocytic Leukaemia (ALL), Hodgkins lymphoma (HL), Granulocytic Sarcoma (GS), Myelofibrosis (MF), Double Hit lymphoma (DHL), Diffuse large B cell lymphoma (DLB CL) T-cell Non Hodgkins Lymphoma TC-NHL). Matched unrelated donor (MUD), Sibling (SIB), Fludarabine (Flu), Melphalan (Melfh), Total body irradiation (TBI), Cyclophosphamide (Cy), Alemtuzumab (Alem), Methotrexate (MTX).

(A)

| Allograft or Autograft | Lymphocyte count at week 2/ $\mu$ L whole blood |
|------------------------|-------------------------------------------------|
| Allograft              | 400                                             |
| Allograft              | 300                                             |
| Allograft              | 400                                             |
| Allograft              | 300                                             |
| Autograft              | 400                                             |
| Autograft              | 300                                             |
| Autograft              | 600                                             |
| Autograft              | 300                                             |

(B)

|                                                          |
|----------------------------------------------------------|
| GSE36476_CTRL_VS_TSST_ACT_72H_MEMORY_CD4_TCELL_OLD_DN    |
| GSE36476_CTRL_VS_TSST_ACT_40H_MEMORY_CD4_TCELL_OLD_DN    |
| GSE15750_DAY6_VS_DAY10_TRAF6KO_EFF_CD8_TCELL_UP          |
| GSE29617_CTRL_VS_TIV_FLU_VACCINE_PBMC_2008_DN            |
| GSE13485_DAY1_VS_DAY21_YF17D_VACCINE_PBMC_DN             |
| GSE21063_WT_VS_NFATC1_KO_8H_ANTI_IGM_STIM_BCELL_UP       |
| GSE24634_TEFF_VS_TCONV_DAY7_IN_CULTURE_UP                |
| GSE33292_WT_VS_TCF1_KO_DN3_THYMOCYTE_DN                  |
| GSE10325_LUPUS_CD4_TCELL_VS_LUPUS_MYELOID_DN             |
| GSE21063_CTRL_VS_ANTI_IGM_STIM_BCELL_NFATC1_KO_8H_DN     |
| GSE36476_CTRL_VS_TSST_ACT_72H_MEMORY_CD4_TCELL_YOUNG_DN  |
| GSE39556_CD8A_DC_VS_NK_CELL_MOUSE_3H_POST_POLYIC_INJ_UP  |
| GSE17974_1H_VS_72H_UNTREATED_IN_VITRO_CD4_TCELL_DN       |
| GSE17974_0H_VS_24H_IN_VITRO_ACT_CD4_TCELL_DN             |
| GSE17974_CTRL_VS_ACT_IL4_AND_ANTI_IL12_48H_CD4_TCELL_DN  |
| GSE24634_TREG_VS_TCONV_POST_DAY7_IL4_CONVERSION_UP       |
| GSE36476_CTRL_VS_TSST_ACT_40H_MEMORY_CD4_TCELL_YOUNG_DN  |
| GSE28726_NAIVE_VS_ACTIVATED_CD4_TCELL_DN                 |
| GSE13547_2H_VS_12_H_ANTI_IGM_STIM_BCELL_DN               |
| GSE3982_MEMORY_CD4_TCELL_VS_TH2_DN                       |
| GSE28726_NAIVE_CD4_TCELL_VS_NAIVE_VA24NEG_NKTCELL_UP     |
| GSE29617_CTRL_VS_DAY3_TIV_FLU_VACCINE_PBMC_2008_DN       |
| GSE33162_UNTREATED_VS_4H_LPS_STIM_HDAC3_KO_MACROPHAGE_DN |
| GSE13547_CTRL_VS_ANTI_IGM_STIM_BCELL_12H_UP              |
| GSE22886_NAIVE_CD4_TCELL_VS_MONOCYTE_DN                  |
| GSE13485_PRE_VS_POST_YF17D_VACCINATION_PBMC_DN           |
| GSE15750_DAY6_VS_DAY10_EFF_CD8_TCELL_UP                  |
| GOLDRATH_EFF_VS_MEMORY_CD8_TCELL_UP                      |
| GSE17974_CTRL_VS_ACT_IL4_AND_ANTI_IL12_24H_CD4_TCELL_DN  |
| GSE24574_BCL6_LOW_TFH_VS_TCONV_CD4_TCELL_DN              |
| GSE18893_TCONV_VS_TREG_24H_TNF_STIM_UP                   |
| GSE14415_INDUCED_TREG_VS_TCONV_UP                        |
| GSE29618_BCELL_VS_MDC_DAY7_FLU_VACCINE_DN                |
| GSE13485_DAY1_VS_DAY7_YF17D_VACCINE_PBMC_DN              |
| GSE14415_INDUCED_VS_NATURAL_TREG_DN                      |
| GOLDRATH_NAIVE_VS_EFF_CD8_TCELL_DN                       |
| GSE5679_CTRL_VS_PPARG_LIGAND_ROSIGLITAZONE_TREATED_DC_UP |

**Supplementary figure 1. RNA-Seq analysis of transcriptome in SCP and week 2 T cells from allograft and autograft patients.**

(A) Table showing the lymphocyte count of each patient used in RNA-Seq study at week 2 post-SCT.

(B) Table showing the the top 25 c7 gene sets from CD4 cells and the top 25 from CD8 cells, resulting in a total of 37 unique terms.

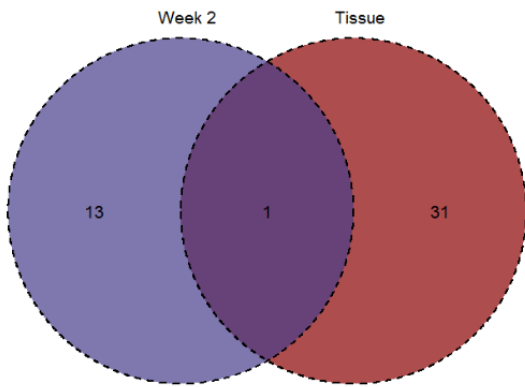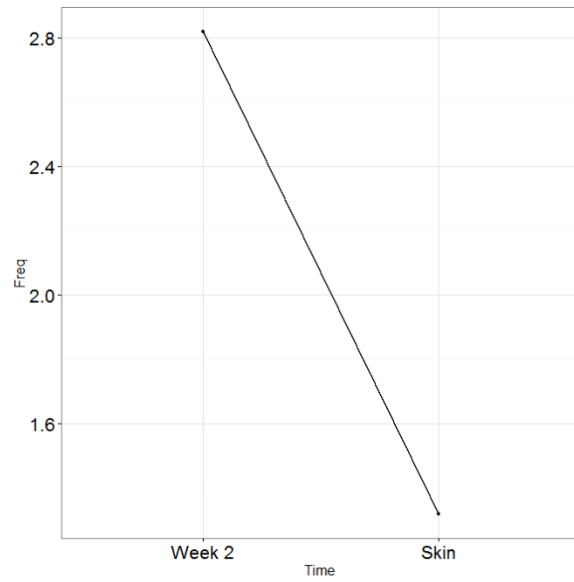

**Supplementary Figure 2. T cell clones at week 2 post HSCT are detectable in GvHD affected tissues.** Venn diagram showing the number of shared TCR beta chain CDR3 sequences between week 2 (blue set) and GvHD Skin (pink set) in the same patient. Line graph shows the log<sub>10</sub> frequency of reads for each T cell clone present in the blood at week 2 and in the skin at the point of aGvHD.

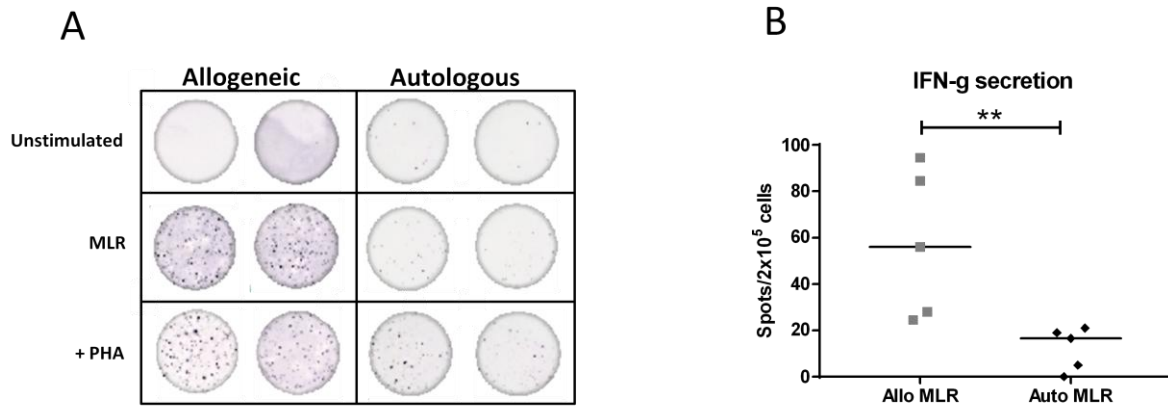

**Supplementary Figure 3. Detection of donor derived alloreactive response at 2 weeks after SCT.** (A) Representative wells in duplicate depicting Interferon gamma (IFN- $\gamma$ ) secretion by PBMCs isolated from patient at day 14 after allogeneic (autologous) transplant.  $1 \times 10^5$  PBMC/well were stimulated either by T cell depleted PBMCs isolated pre-transplant from the patient in a mixed lymphocyte reaction (MLR) or with PHA. (B) IFN- $\gamma$  release measured in 5 allogeneic and 5 autologous transplant patients as IFN- $\gamma$  spots/ $2 \times 10^5$  cells per well. Statistical comparison was made using Mann-Whitney test, \*\* depict p value  $< 0.01$

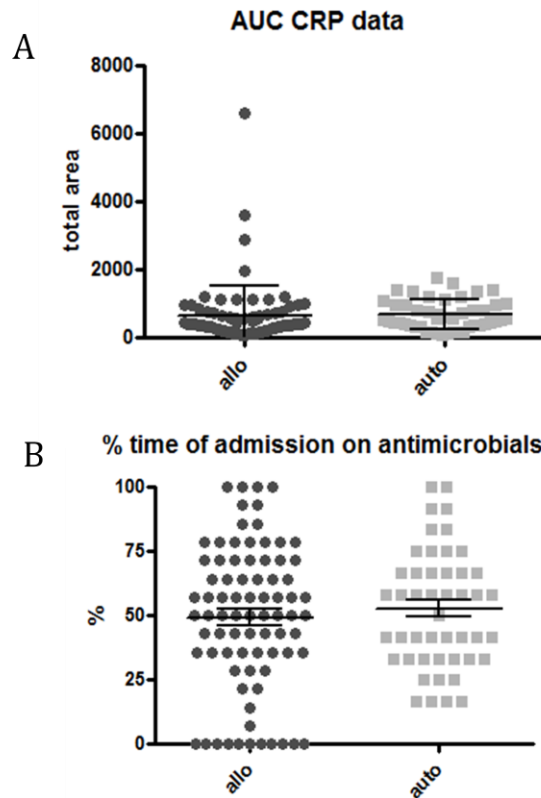

**Supplementary Figure 4. There was no difference in the infection rate between the auto and allo-HSCT patients. A.** Area under the curve analyses were performed for each patient's CRP levels. Allo-HSCT patients inpatient stays were 14 days on average, while auto-HSCT patient stays were 12 days. There is no difference in the mean AUC suggesting that the inflammatory response early after HSCT was not significantly different in allo versus auto-HSCT. **B.** The percentage of time a patient spent receiving Intravenous antimicrobials throughout their inpatient stay was calculated for all patients. There is no demonstrable difference between allo and auto-HSCT groups.

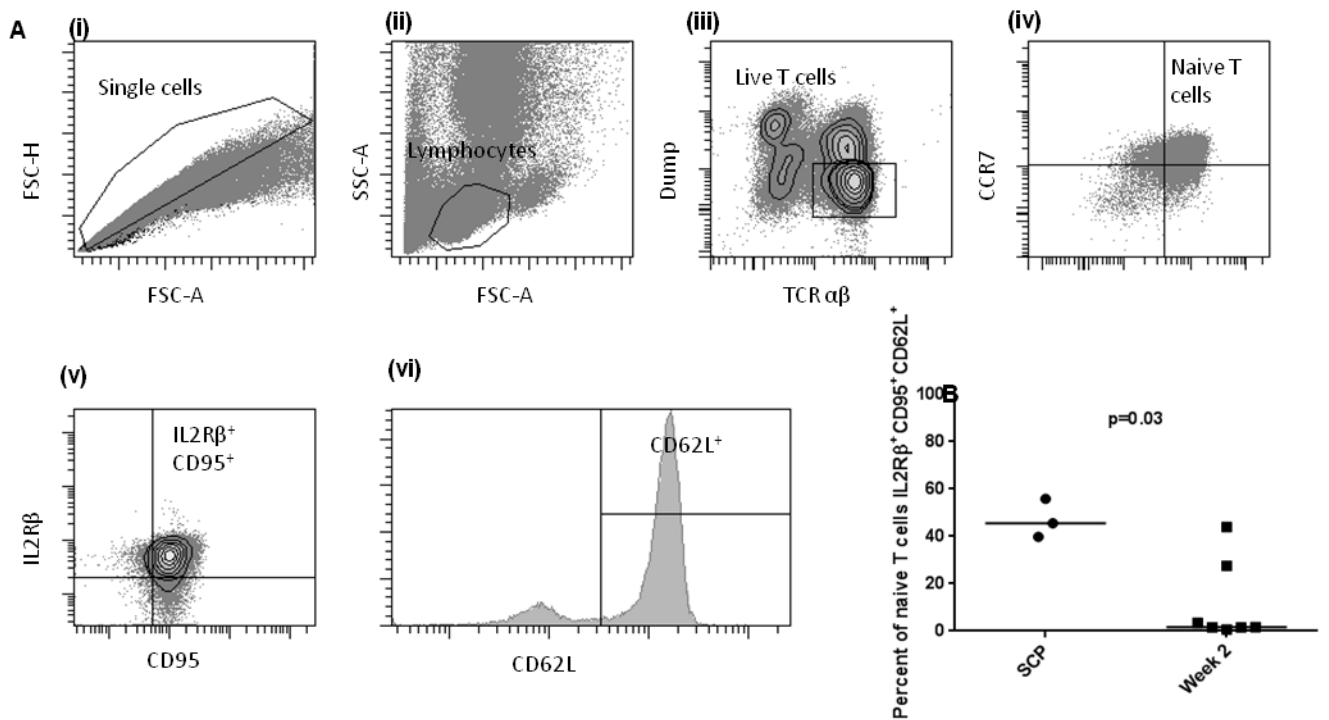

**Supplementary Figure 5. Frequencies of memory stem T cells at week 2 and in the stem cell product.**

Analysis of memory stem T-cells as a proportion of total T cells present in the stem cell product and in matched week 2 peripheral blood of allograft patients. All patients underwent FMC conditioning. Memory stem T-cells are defined as TCR $\alpha\beta^+$  CD45RA $^+$  CCR7 $^+$  IL2R $\beta^+$  CD95 $^+$  and CD62L $^+$ . (A) gating strategy: (i) single cells (ii) lymphocytes (iii) live  $\alpha\beta$  T-cells (iv) CD45RA $^+$  CCR7 $^-$  T-cells (v) IL2R $\beta^+$ CD95 $^+$  (vi) CD62L. b) Proportion of memory stem T cells in the stem cell product (SCP) and at week 2 post transplant in matched patient samples. Each line represents one patient; data were analysed by two-tailed, Willcoxon matched-paired sign rank test; \* $p<0.05$

**Supplementary data 1. Excel spreadsheet listing all data from the RNA-seq analysis of transcriptome in SCP and week2 T cells from autograft and allograft patients.**

Tab1: all significantly differentially regulated genes in CD4 and CD8 T cells from SCP T cells (comparing autograft and allograft) and in CD4 and CD8 T cells from week 2 T cells (comparing autograft and allograft). Each row indicates one gene (represented by its ensemble ID). A positive log2 fold change (log2FoldChange) indicates upregulation of the gene in allografts compared to autografts; a negative log2 fold change (log2FoldChange) indicates downregulation of the gene in allografts compared to autografts. T cell type and timepoint are specified in columns H and I. padj: adjusted p value (calculated using the Benjamini-Hochberg procedure).

Tab2: all significantly differentially regulated gene ontology (GO) terms in CD4 and CD8 T cells from SCP T cells (comparing autograft and allograft) and in CD4 and CD8 T cells from week 2 T cells (comparing autograft and allograft). Each row indicates one GO term. The columns represent q-values for GSEA tests, comparing allografts vs autografts. The header of each column describes the cell type (CD4 or CD8), the time point (SCP or WK2), and whether each gene set is overrepresented (greater) or underrepresented (less).

Tab3: All significantly differentially regulated MSigDB 'hallmark' gene sets. Each row indicates one gene set. The columns represent q-values for GSEA tests, comparing allografts vs autografts. The header of each column describes the cell type (CD4 or CD8), the time point (SCP or WK2), and whether each gene set is overrepresented (greater) or underrepresented (less).

Tab4: All significantly differentially regulated 'C7 immunological signatures' gene sets. The columns represent q-values for GSEA tests, comparing allografts vs autografts. The header of each column describes the cell type (CD4 or CD8), the time point (SCP or WK2), and whether each gene set is overrepresented (greater) or underrepresented (less).
